# Supplementary material for: Characterization of Northwest African Coastal Upwelling Systems
Source: Copernicus journal article supplement (doi:10.5194/egusphere-2024-4175), 2025-01-27
Supplement: Supplementary file [file egusphere-2024-4175-AC2-supplement.pdf]

## Supplementary Material

**Table 1: Different datasets and resolution used in this study**

| Dataset                          | Types                  | Variables                                                                                                            | Spatial Resolution               | Characteristics                                                                                                                                                                                                                              | Cover period |
|----------------------------------|------------------------|----------------------------------------------------------------------------------------------------------------------|----------------------------------|----------------------------------------------------------------------------------------------------------------------------------------------------------------------------------------------------------------------------------------------|--------------|
| ORAS5                            | Ocean reanalysis       | SST, sea surface salinity, zonal and meridional wind stress, zonal and meridional velocity                           | 0.25°x0.25°                      | NEMO version 3.4 ocean model, 75 vertical levels, forced with ERA-40 (before 1979), ERA-Interim (1979-2015) and real-time Numerical Weather Prediction (NWP, 2015-present), with bulk formula + wave forcing, HadISST and OSTIA observations | 1980 - 2023  |
| ERA5                             | Atmospheric reanalysis | SST, zonal and meridional wind components                                                                            | 0.25°x0.25°<br>137 levels to 1Pa | Copernicus Climate Change Service (C3S) 137 levels to 1 Pa, HadISST, OSTIA with bulk formula, including global atmosphere, land surface and ocean waves                                                                                      | 1980 - 2023  |
| HadISST                          | Station observations   | SST                                                                                                                  | 1° x 1°                          |                                                                                                                                                                                                                                              | 1980 - 2023  |
| OSTIA                            | Satellite              | SST<br>SST, zonal and meridional wind stress, zonal and meridional velocity, sea surface salinity, sea level anomaly | 0.05°x0.05°                      | Advance Very High-Resolution Radiometers (AVHRRs), Along Track Scanning Radiometers (ATSRs), Sea and Land Surface Radiometer (SLSRs), 2, 3, 4 levels                                                                                         | 1982 - 2022  |
| Global Ocean reanalysis (GLORYS) | Ocean reanalysis       |                                                                                                                      | 0.083°x0.083°                    | GLORYS12 version 1 ocean physics model, (1993-present), 50 vertical levels, forced with ERA-Interim and a real-time global                                                                                                                   | 1993-2020    |

|                                                    |                             |                             |               |                                                                                        |           |
|----------------------------------------------------|-----------------------------|-----------------------------|---------------|----------------------------------------------------------------------------------------|-----------|
|                                                    |                             |                             |               | forecasting CMEMS system                                                               |           |
| Global Ocean Biogeochemistry Analysis and Forecast | Ocean Analysis and Forecast | Oxygen (O2), nitrate (NO3)  | 0.25°x0.25°   | NEMO version 3.6, forced with GLOBAL_ANALYSIS_FORECAST_PHYS_001_024 at daily frequency | 2020-2021 |
| NOAA                                               | Satellite                   | Chlorophyll-a concentration | 0.042°x0.042° | Regular longitude-latitude grid, Single level and daily frequency                      | 1997-2023 |
| NOAA-CPC                                           | Climate indices             | Niño 3.4 and NAO            | Time-series   |                                                                                        | 1982-2023 |

**Table S2: Upwelling indices used in this study**

| Acronyms           | Full Name                                                  | Definition                                                                                                             | Formula                                                                                                               | Unit                      |
|--------------------|------------------------------------------------------------|------------------------------------------------------------------------------------------------------------------------|-----------------------------------------------------------------------------------------------------------------------|---------------------------|
| $M_{(x)}, M_{(y)}$ | Zonal Ekman and Meridional Transport                       | Upwelling index related to offshore wind stress                                                                        | $M_{(x)} = \frac{\tau^y}{\rho_w f}$ $M_{(y)} = -\frac{\tau^x}{\rho_w f}$                                              | $m^2 \cdot s^{-1}$        |
| $W_{scd}$          | Wind-stress curl driven upwelling (Ekman pumping velocity) | Upwelling related to coastal divergence                                                                                | $W_{scd} = \frac{1}{\rho_w f} \left( \frac{\partial \tau^y}{\partial x} - \frac{\partial \tau^x}{\partial y} \right)$ | $m \cdot day^{-1}$        |
| $W_t$              | Total wind-driven upwelling index                          | Sum of offshore Ekman transport velocity and inshore Ekman (offshore divergence) pumping velocity (coastal divergence) | $W_t = M_{(x,y)} + W_{scd}$                                                                                           | $m \cdot day^{-1}$        |
| $CUI$              | Cumulative upwelling index                                 | Integrated daily upwelling index over the upwelling cycle                                                              | $CUI(t) = \sum_{i=0}^t UI(i) \cdot \Delta t$                                                                          | $m^2 \cdot s^{-1}$ and °C |
| $TUM$              | Total upwelling magnitude                                  | Cumulative upwelling index from the start to the end dates of upwelling season                                         | $TUM = \sum_{END}^{STI} CUI(t)$                                                                                       | $m^2 \cdot s^{-1}$ and °C |
| $SST_{index}$      | SST gradient                                               | SST difference between offshore and coastal areas                                                                      | $SST_{ui} = SST_{open-ocean} - SST_{coast}$                                                                           | °C                        |

|                            |                                                                                                                 |                                                                                                                               |                                                                                                                                                                                                                                                                                                                                        |                    |
|----------------------------|-----------------------------------------------------------------------------------------------------------------|-------------------------------------------------------------------------------------------------------------------------------|----------------------------------------------------------------------------------------------------------------------------------------------------------------------------------------------------------------------------------------------------------------------------------------------------------------------------------------|--------------------|
| $T_g,$<br>$UI_{(SLA,SSH)}$ | Onshore<br>geostrophic<br>Transport<br>and coastal<br>upwelling<br>index based<br>on the<br>geostrophic<br>flow | Component of geostrophic<br>current that flows from<br>open-ocean to the coast,<br>Coastal divergence based<br>on SLA and SSH | $T_g = \frac{g}{f} \frac{\partial \eta_{lat} - \partial \eta_{lon}}{d} MLD$ $UI_{(SLA,SSH)} = \left( \frac{\partial v g}{\partial x} + \frac{\partial u g}{\partial y} \right)$ <p>Where <math>ug = -\frac{g}{f} \frac{\partial \eta}{\partial y}, vg = \frac{g}{f} \frac{\partial \eta}{\partial x}</math>,</p> $\eta$ is SSLA or SSH | $m^2 \cdot s^{-1}$ |
|----------------------------|-----------------------------------------------------------------------------------------------------------------|-------------------------------------------------------------------------------------------------------------------------------|----------------------------------------------------------------------------------------------------------------------------------------------------------------------------------------------------------------------------------------------------------------------------------------------------------------------------------------|--------------------|

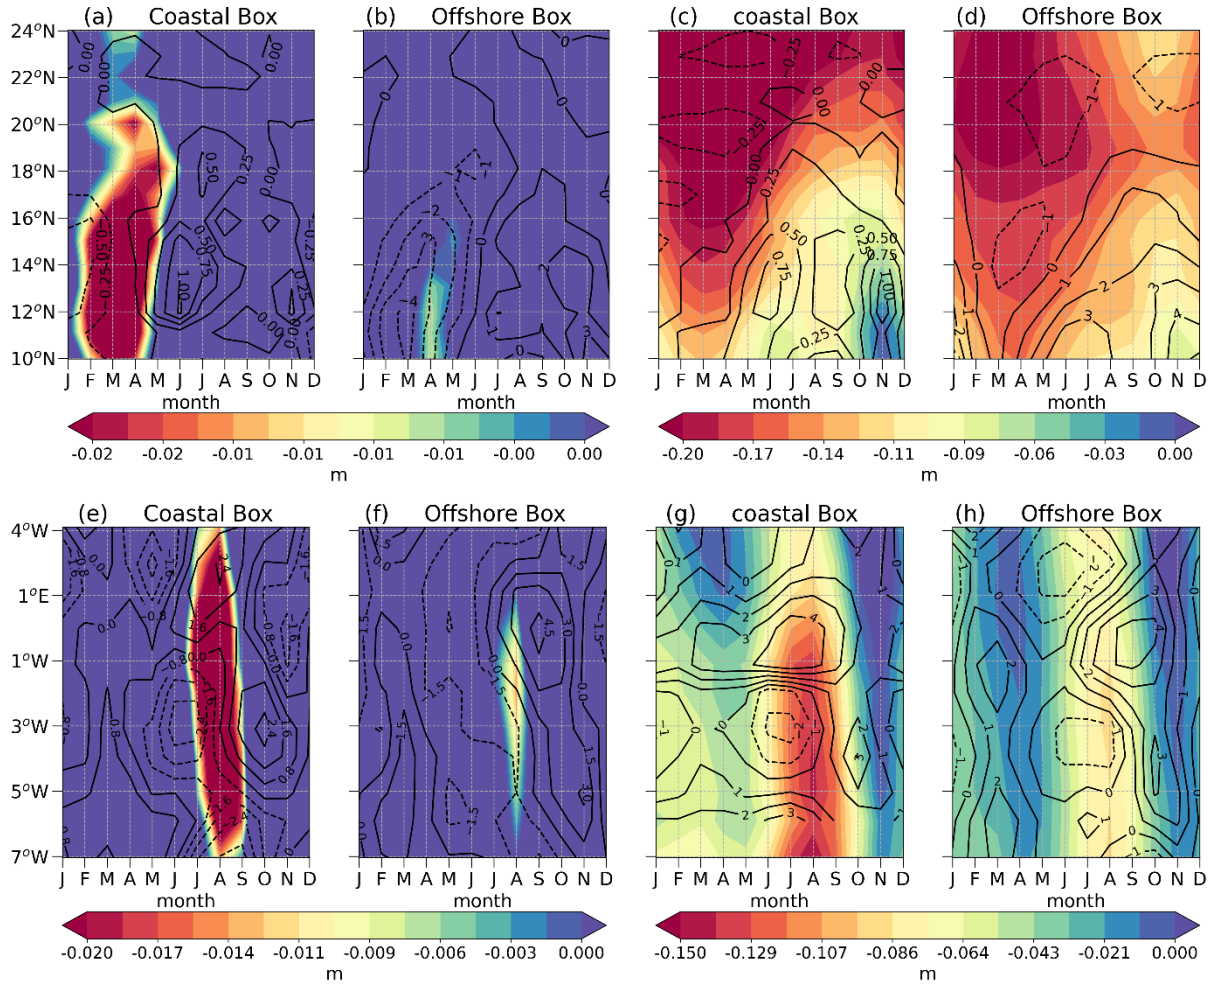

**Figure S1:** a-b Seasonal sea level anomaly (shading, m) and the divergence computed with sea Level Anomaly (SLA) (contour,  $m^2 s^{-1}$ ) in the Senegal-Mauritania coastal Upwelling System (SMUS). c-d Sea surface height (shading, m) and divergence in computed with Sea Surface Height ( $m^2 s^{-1}$ ) in the Senegal-Mauritania coastal Upwelling System (SMUS). e-f Seasonal sea level anomaly (shading, m) and the divergence computed with sea Level Anomaly (SLA) (contour,  $m^2 s^{-1}$ ) in the Gulf of Guinea coastal Upwelling System (GGUS). g-h Sea surface height (shading, m) and divergence in computed with Sea Surface Height ( $m^2 s^{-1}$ ) in the Gulf of Guinea coastal Upwelling System (GGUS). Warm colour denotes negative SLA or SSH resulting the favourable upwelling conditions including coastal trapped waves (CTWs) propagating poleward. Cool colour denotes the positive SLA or SSH resulting favourable downwelling events including Kelvin waves arriving from the equatorward and generating poleward CTWs.

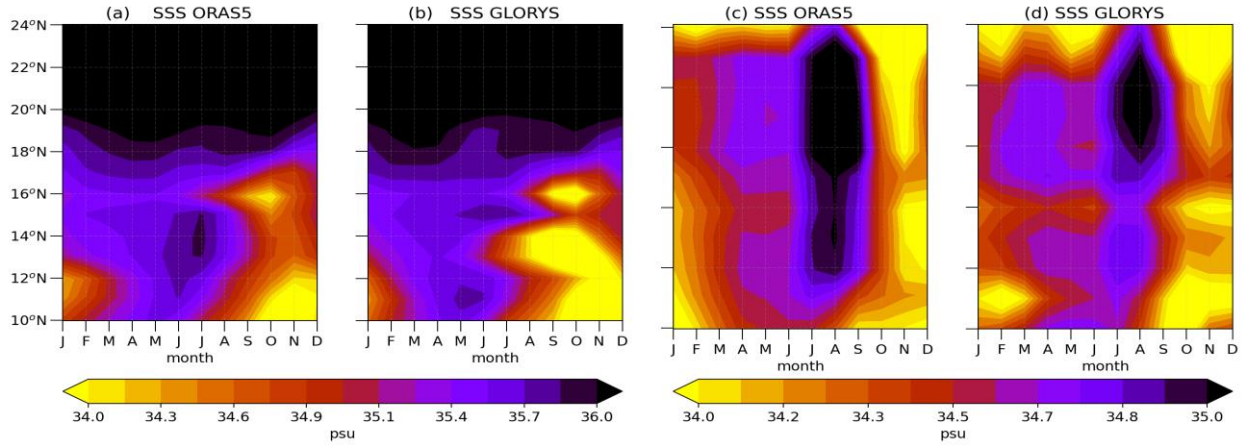

**Figure S2:** Seasonal variability of Surface salinity in the Senegal-Mauritania (a, b) and Gulf of Guinea (c, d) coastal upwelling systems. Warm black colour denotes the concentration of sea surface salinity. a, c Five generation of ocean reanalysis system (ORAS5) products. b, d Global physics ocean reanalysis (GLORYS) products.

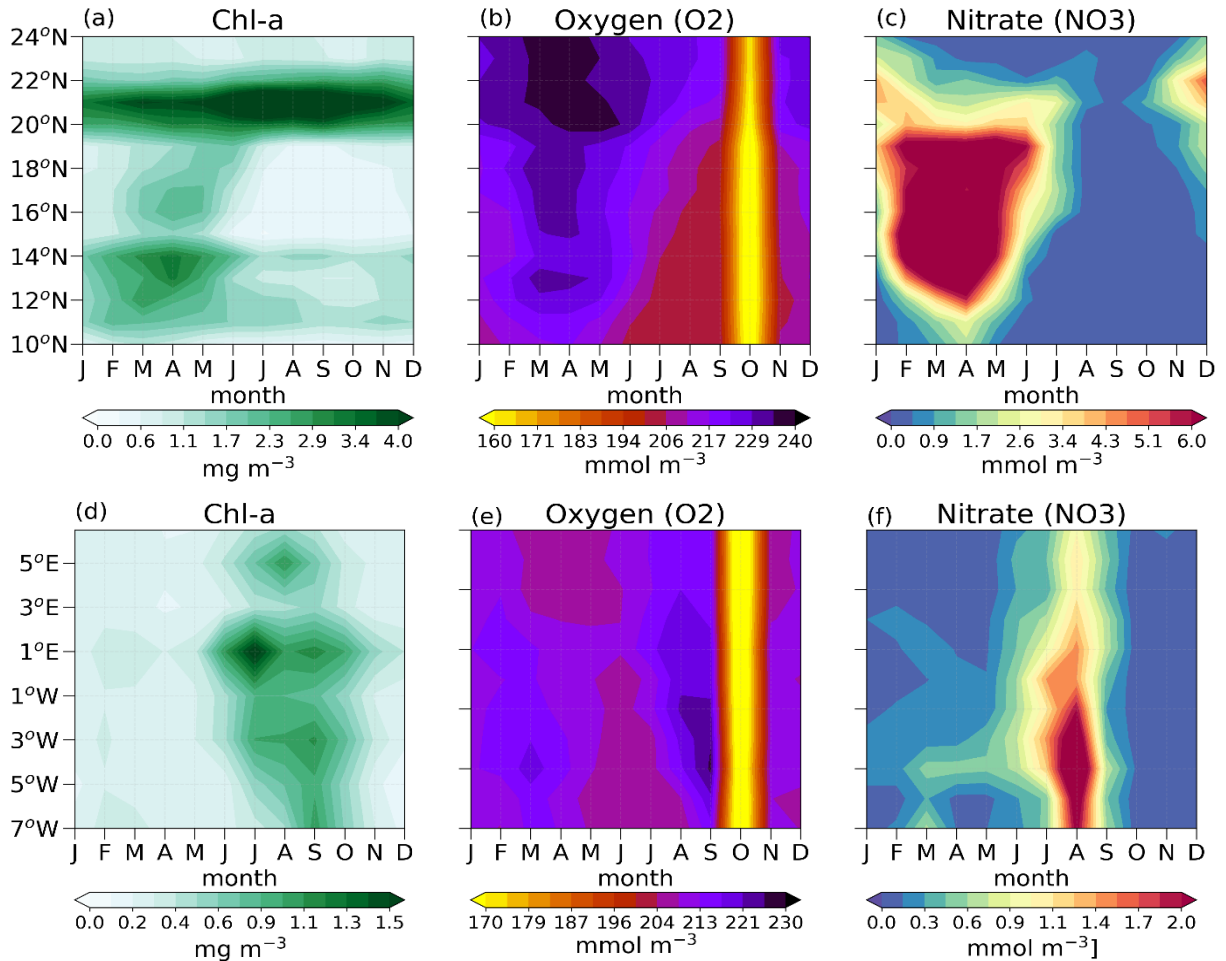

**Figure S3:** a, b, c Seasonal variability of chlorophyll-a concentration, dissolved oxygen and Nitrate in the Senegal-Mauritania Upwelling System (SMUS). d, e, f Seasonal variability of chlorophyll-a concentration, dissolved oxygen and Nitrate in the Gulf upwelling system (GGUS). Warm green colour (a, d) shows the strong chlorophyll-a concentration. Yellow colour (b, e) shows minimum peak of dissolved oxygen which coincides with upwelling transition month (October) in both upwelling systems. Warm colour (c, f) denotes strong concentration of nitrate with coincides with the maximum peak of upwelling in each upwelling system.

The seasonal variability of sea surface salinity (Fig. S2), dissolved oxygen, nitrate and chlorophyll-a concentration (Fig. S3) was analysed as additional upwelling indicators of upwelling in the two systems. In the SMUS, the maximum surface salinity is observed in the permanent upwelling region over 18°N and reaches in the southern area during the peaks of local upwelling. The spatial variability of salinity seems to be related to the large circulation of Atlantic Ocean surface water masses than upwelling winds driving by the North Atlantic Subtropical and Tropical gyres (Benazzouz et al., 2014). The northern maximum Salinity (>35 psu) can be linked to the North Atlantic Central dense Waters (SACWs). Whereas, the relative weak surface salinity (>35 psu) seems to be related to the Southern Atlantic Central warm Water masses (SACWs) salinity. The maximum peaks of dissolved oxygen (O<sub>2</sub>), nitrate (NO<sub>3</sub>) and chlorophyll-a concentration (Chl) are well correlated to the seasonality of upwelling (December-June). The main concentration of O<sub>2</sub> is observed in the permanent upwelling region when NO<sub>3</sub> supply peaks in the seasonal upwelling with intense upwelling events (March-April-May). However, the minimum peaks of these variables coincide with the highest SST (September-October). In the GGUS the Figs. S7 c, d and S8 d, f show that the temporal and spatial distribution of the surface salinity, O<sub>2</sub> and NO<sub>3</sub> are directly connected to upwelling season (JAS). This connection between upwelling events and peaks of sea surface salinity (>34 psu) can be explained by considering the physical and oceanographic processes associated with upwelling. The deep ocean waters that rise to the surface are typical stable and more saline than the surface layer often diluted by precipitation and river runoff. When the upwelling occurs, it replaces this surface waters with saltier waters leading to an increase in surface salinity and nutrients. Compared to the SMUS, the concentration of the three variables is more important in SMUS than in the GGUS because of the intensity and duration of upwelling.

### Differential Drivers of SMUS and GGUS Variability

The correlation tables also highlight the differing roles of other climate modes. For example, the North Atlantic Oscillations (NAO) shows a moderate influence on SMUS upwelling, particularly during JJA ( $r = -0.33$  for SST-UI), consistent with previous studies that link positive NAO phases to intensified trade winds along the Northwest African coast. The Atlantic Meridional Mode (AMM) and North Tropical Atlantic (NTA) have significant impacts on GGUS, with correlations reaching  $r = -0.58$  (AMM and SST-UI, JJA), confirming that Atlantic meridional modes modulate interhemispheric SST gradients that influence equatorial and coastal winds. The Southern Oscillations Index SOI is positively correlated with upwelling in both regions during DJF, reflecting its inverse relationship with El Niño events.

These results demonstrate the complexity of climate–upwelling interactions in this region and highlight the importance of considering both seasonality and regional specificity in assessing climate impacts on coastal ocean dynamics.

**Table S3: Lag/lead correlation coefficients between climate indices and UIs during winter period**

| DJF   | Ekman Transport Index in SMUS |       |        |        |        | SST Upwelling Index in GGUS |       |       |        |        |
|-------|-------------------------------|-------|--------|--------|--------|-----------------------------|-------|-------|--------|--------|
|       | Lag 2                         | Lag 1 | Lag 0  | Lead 1 | Lead 2 | Lag 2                       | Lag 1 | Lag 0 | Lead 1 | Lead 2 |
| ENSO+ | -0.51                         | 0.91  | 0.90   | 0.84   | 0.81   | 0.14                        | 0.97  | 0.43  | 0.31   | 0.26   |
| ENSO- | 0.99*                         | 0.98  | -0.35  | -0.99* | -0.98  | -0.68                       | -0.51 | -0.46 | 0.60   | 0.80   |
| NAO+  | -0.99*                        | -0.49 | -0.99* | 0.57   | 0.97   | 0.92                        | -0.49 | 0.94  | -0.20  | -0.80  |

|       |       |        |       |        |        |        |       |        |        |        |
|-------|-------|--------|-------|--------|--------|--------|-------|--------|--------|--------|
| NAO-  | 0.52  | 0.96   | -0.48 | -0.99* | -0.44  | 0.30   | -0.84 | -0.35  | 0.75   | 0.97   |
| SOI+  | -0.96 | -0.32  | -0.11 | 0.50   | 0.93   | 0.34   | 0.96  | -0.74  | 0.42   | -0.84  |
| SOI-  | 0.34  | 0.85   | -0.19 | 0.88   | 0.58   | -0.83  | 0.52  | 0.91   | -0.24  | 0.93   |
| ATL3+ | 0.10  | -0.91  | -0.96 | -0.98  | -0.84  | -0.60  | 0.55  | 0.67   | 0.72   | 0.43   |
| ATL3- | 0.20  | 0.23   | -0.91 | -0.82  | -0.45  | 0.32   | 0.29  | 0.99*  | 0.43   | 0.83   |
| AMM+  | -0.89 | -0.81  | 0.72  | 0.99*  | 0.99*  | 0.99*  | 0.52  | -0.40  | -0.87  | -0.96  |
| AMM-  | -0.41 | -0.09  | 0.99* | 0.38   | -0.15  | 0.79   | 0.56  | -0.86  | -0.78  | -0.34  |
| AMO+  | 0.06  | 0.66   | -0.55 | 0.77   | -0.64  | -0.59  | 0.99* | 0.12   | -0.18  | 0.009  |
| AMO-  | 0.88  | -0.99* | -0.97 | -0.91  | 0.59   | -0.82  | 0.36  | 0.23   | 0.79   | -0.99* |
| PDO+  | -0.85 | -0.99* | -0.95 | -0.82  | 0.0006 | 0.59   | 0.94  | 0.99*  | 0.55   | 0.37   |
| PDO-  | 0.96  | 0.60   | -0.88 | 0.48   | -0.72  | -0.99* | -0.46 | 0.94   | -0.62  | 0.60   |
| ONI+  | -0.82 | -0.40  | 0.99* | 0.95   | 0.90   | 0.32   | -0.22 | -0.80  | -0.59  | -0.47  |
| ONI-  | 0.78  | -0.94  | -0.89 | -0.98  | -0.98  | -0.81  | -0.06 | 0.68   | 0.45   | 0.45   |
| NOI+  | -0.33 | -0.98  | -0.61 | 0.98   | 0.52   | -0.74  | 0.23  | 0.97   | -0.22  | -0.99* |
| NOI-  | -0.13 | 0.92   | 0.80  | -0.73  | -0.99* | 0.85   | -0.27 | -0.97  | -0.07  | 0.72   |
| PNA+  | -0.67 | -0.92  | 0.99* | 0.92   | 0.95   | 0.26   | 0.99* | -0.82  | -0.64  | -0.99  |
| PNA-  | 0.88  | 0.63   | 0.95  | 0.96   | -0.32  | -0.99* | -0.89 | -0.99* | -0.99* | -0.09  |
| NTA+  | -0.94 | -0.99* | 0.34  | -0.89  | 0.49   | 0.70   | 0.88  | -0.72  | 0.99*  | -0.05  |
| NTA-  | 0.75  | 0.64   | -0.30 | 0.69   | 0.72   | 0.33   | 0.47  | -0.77  | 0.41   | 0.37   |

**Table S4: Lag/lead correlation coefficients between climate indices and Us during spring period**

| MAM   | Ekman transport Index |        |        |        |        | SST upwelling Index |       |        |        |        |
|-------|-----------------------|--------|--------|--------|--------|---------------------|-------|--------|--------|--------|
|       | Lag 2                 | Lag 1  | Lag 0  | Lead 1 | Lead 2 | Lag 2               | Lag 1 | Lag 0  | Lead 1 | Lead 2 |
| ENSO+ | 0.48                  | 0.53   | 0.58   | 0.55   | 0.47   | 0.48                | 0.43  | 0.38   | 0.50   | 0.41   |
| ENSO- | 0.82                  | 0.63   | 0.73   | 0.81   | 0.63   | -0.79               | -0.59 | -0.69  | -0.77  | -0.59  |
| NAO+  | -0.99*                | -0.83  | -0.99* | 0.13   | -0.84  | 0.99*               | 0.72  | 0.99*  | -0.29  | 0.92   |
| NAO-  | 0.99*                 | 0.46   | -0.99* | -0.75  | 0.91   | -0.99*              | -0.64 | 0.93   | 0.87   | -0.80  |
| SOI+  | -0.89                 | -0.93  | -0.98  | -0.80  | 0.79   | 0.85                | 0.64  | 0.95   | 0.41   | -0.99  |
| SOI-  | -0.47                 | -0.93  | -0.98  | -0.80  | 0.79   | 0.85                | 0.64  | 0.95   | 0.41   | 0.98   |
| ATL3+ | -0.14                 | 0.22   | 0.02   | -0.11  | -0.62  | -0.77               | -0.95 | -0.87  | -0.80  | -0.35  |
| ATL3- | -0.43                 | -0.82  | -0.69  | -0.34  | 0.96   | 0.13                | 0.96  | 0.88   | 0.62   | 0.82   |
| AMM+  | -0.75                 | -0.89  | -0.92  | -0.58  | -0.99* | 0.99*               | 0.93  | 0.90   | 0.99*  | 0.64   |
| AMM-  | 0.88                  | 0.99   | 0.68   | 0.40   | 0.91   | -0.68               | -0.21 | 0.53   | -0.98  | -0.63  |
| AMO+  | -0.21                 | -0.39  | 0.06   | -0.09  | -0.06  | -0.16               | 0.03  | -0.41  | -0.27  | -0.31  |
| AMO-  | 0.59                  | -0.13  | 0.93   | 0.99   | 0.32   | -0.34               | -0.15 | -0.99* | -0.98  | 0.04   |
| PDO+  | 0.99*                 | -0.63  | -0.89  | -0.87  | 0.50   | -0.99*              | 0.44  | 0.97   | 0.96   | -0.28  |
| PDO-  | 0.01                  | 0.97   | 0.99*  | -0.30  | -0.89  | -0.52               | -0.95 | -0.84  | 0.75   | 0.53   |
| ONI+  | -0.41                 | -0.27  | -0.23  | -0.26  | -0.20  | 0.90                | 0.83  | 0.81   | 0.82   | 0.79   |
| ONI-  | 0.44                  | 0.44   | 0.26   | 0.06   | -0.87  | -0.15               | -0.15 | 0.04   | 0.25   | 0.69   |
| NOI+  | -0.99*                | -0.23  | -0.31  | -0.75  | -0.66  | 0.70                | -0.41 | 0.83   | 0.19   | 0.06   |
| NOI-  | 0.99*                 | 0.52   | -0.22  | 0.99*  | -0.05  | -0.96               | -0.82 | -0.18  | -0.94  | -0.35  |
| PNA+  | -0.99*                | -0.79  | -0.97  | -0.15  | 0.97   | 0.99*               | 0.80  | 0.96   | 0.17   | -0.97  |
| PNA-  | 0.60                  | -0.82  | 0.64   | -0.68  | 0.97   | -0.82               | 0.61  | -0.84  | 0.43   | -0.85  |
| NTA+  | 0.78                  | -0.66  | -0.98  | -0.99* | -0.97  | -0.85               | 0.57  | 0.95   | 0.99*  | 0.99*  |
| NTA-  | -0.99*                | -0.99* | 0.19   | 0.96   | 0.99*  | 0.97                | 0.96  | -0.44  | -0.99* | -0.98  |

**Table S5: Lag/lead correlation coefficients between climate indices and UIs during summer period**

| JAS   | Ekman Transport |       |        |        |        | SST Upwelling Index |       |        |        |        |
|-------|-----------------|-------|--------|--------|--------|---------------------|-------|--------|--------|--------|
|       | Lag 2           | Lag 1 | Lag 0  | Lead 1 | Lead 2 | Lag 2               | Lag 1 | Lag 0  | Lead 1 | Lead 2 |
| ENSO+ | 0.57            | 0.92  | 0.93   | 0.15   | -0.51  | 0.55                | 0.008 | -0.006 | 0.97   | 0.61   |
| ENSO- | -0.99*          | -0.38 | 0.99*  | 0.99*  | 0.94   | 0.75                | 0.95  | -0.75  | -0.60  | -0.87  |
| NAO+  | 0.15            | 0.78  | -0.99* | 0.97   | -0.25  | 0.81                | -0.91 | 0.57   | -0.22  | -0.74  |
| NAO-  | -0.67           | -0.45 | 0.97   | 0.68   | -0.81  | -0.13               | 0.97  | -0.44  | -0.99* | 0.97   |
| SOI+  | -0.51           | -0.31 | -0.41  | -0.99* | -0.45  | -0.27               | 0.90  | -0.37  | 0.63   | 0.95   |
| SOI-  | -0.97           | 0.87  | 0.82   | -0.92  | -0.57  | 0.83                | -0.98 | -0.58  | 0.99*  | 0.27   |
| ATL3+ | 0.92            | -0.76 | -0.98  | -0.99* | -0.99* | 0.89                | 0.007 | -0.48  | -0.69  | -0.71  |
| ATL3- | -0.95           | -0.80 | -0.64  | -0.62  | -0.53  | -0.93               | -0.27 | -0.03  | -0.005 | 0.10   |
| AMM+  | 0.97            | -0.62 | -0.78  | -0.88  | -0.91  | -0.72               | -0.33 | -0.12  | 0.07   | 0.12   |
| AMM-  | 0.11            | -0.93 | 0.99*  | -0.30  | -0.95  | 0.06                | -0.98 | -0.97  | 0.46   | 0.88   |
| AMO+  | -0.86           | -0.90 | -0.09  | 0.85   | 0.88   | -0.47               | -0.39 | 0.99*  | 0.49   | 0.42   |
| AMO-  | -0.89           | 0.62  | 0.35   | -0.99* | 0.43   | 0.83                | 0.37  | -0.99* | 0.44   | 0.57   |
| PDO+  | 0.61            | 0.66  | 0.86   | 0.99*  | -0.47  | -0.71               | 0.66  | -0.60  | 0.08   | -0.92  |
| PDO-  | 0.99*           | -0.51 | -0.98  | 0.64   | 0.94   | -0.83               | -0.09 | 0.90   | -0.07  | -0.57  |
| ONI+  | 0.76            | 0.75  | 0.62   | 0.69   | 0.77   | 0.59                | 0.61  | 0.74   | 0.67   | 0.57   |
| ONI-  | 0.71            | 0.98  | 0.96   | 0.99   | 0.98   | 0.19                | -0.41 | -0.32  | -0.47  | -0.38  |
| NOI+  | -0.52           | 0.78  | 0.86   | 0.93   | 0.95   | 0.99*               | 0.06  | -0.09  | -0.24  | -0.31  |
| NOI-  | -0.42           | -0.31 | -0.27  | -0.26  | -0.27  | 0.18                | 0.07  | 0.03   | 0.01   | 0.03   |
| PNA+  | -0.41           | -0.58 | 0.96   | -0.34  | -0.79  | -0.76               | 0.94  | -0.51  | -0.81  | -0.80  |
| PNA-  | 0.78            | -0.57 | -0.93  | 0.78   | 0.78   | -0.91               | 0.35  | 0.99*  | -0.61  | -0.61  |
| NTA+  | 0.88            | 0.93  | 0.86   | 0.94   | 0.68   | 0.19                | 0.07  | 0.23   | 0.04   | -0.90  |
| NTA-  | -0.91           | -0.98 | -0.99* | -      | 0.58   | 0.15                | 0.41  | 0.63   | -      | 0.35   |

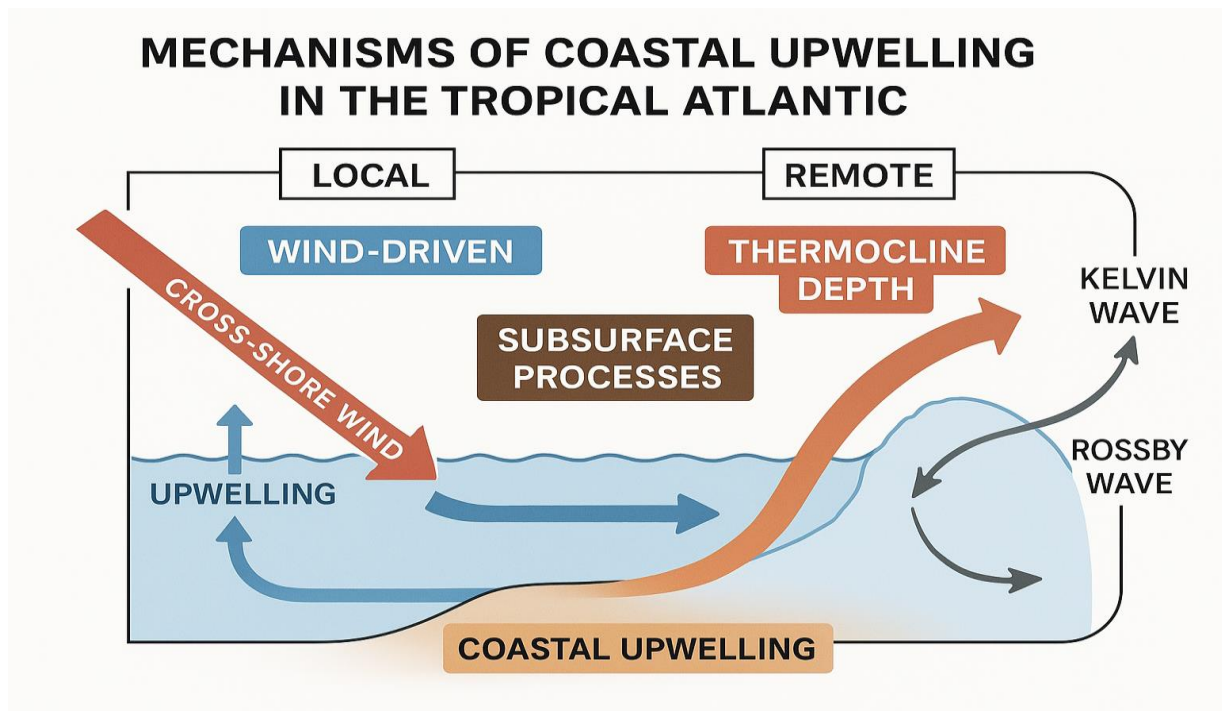

**Figure S5:** Summary of Coastal Upwelling Mechanisms in the Tropical Atlantic.

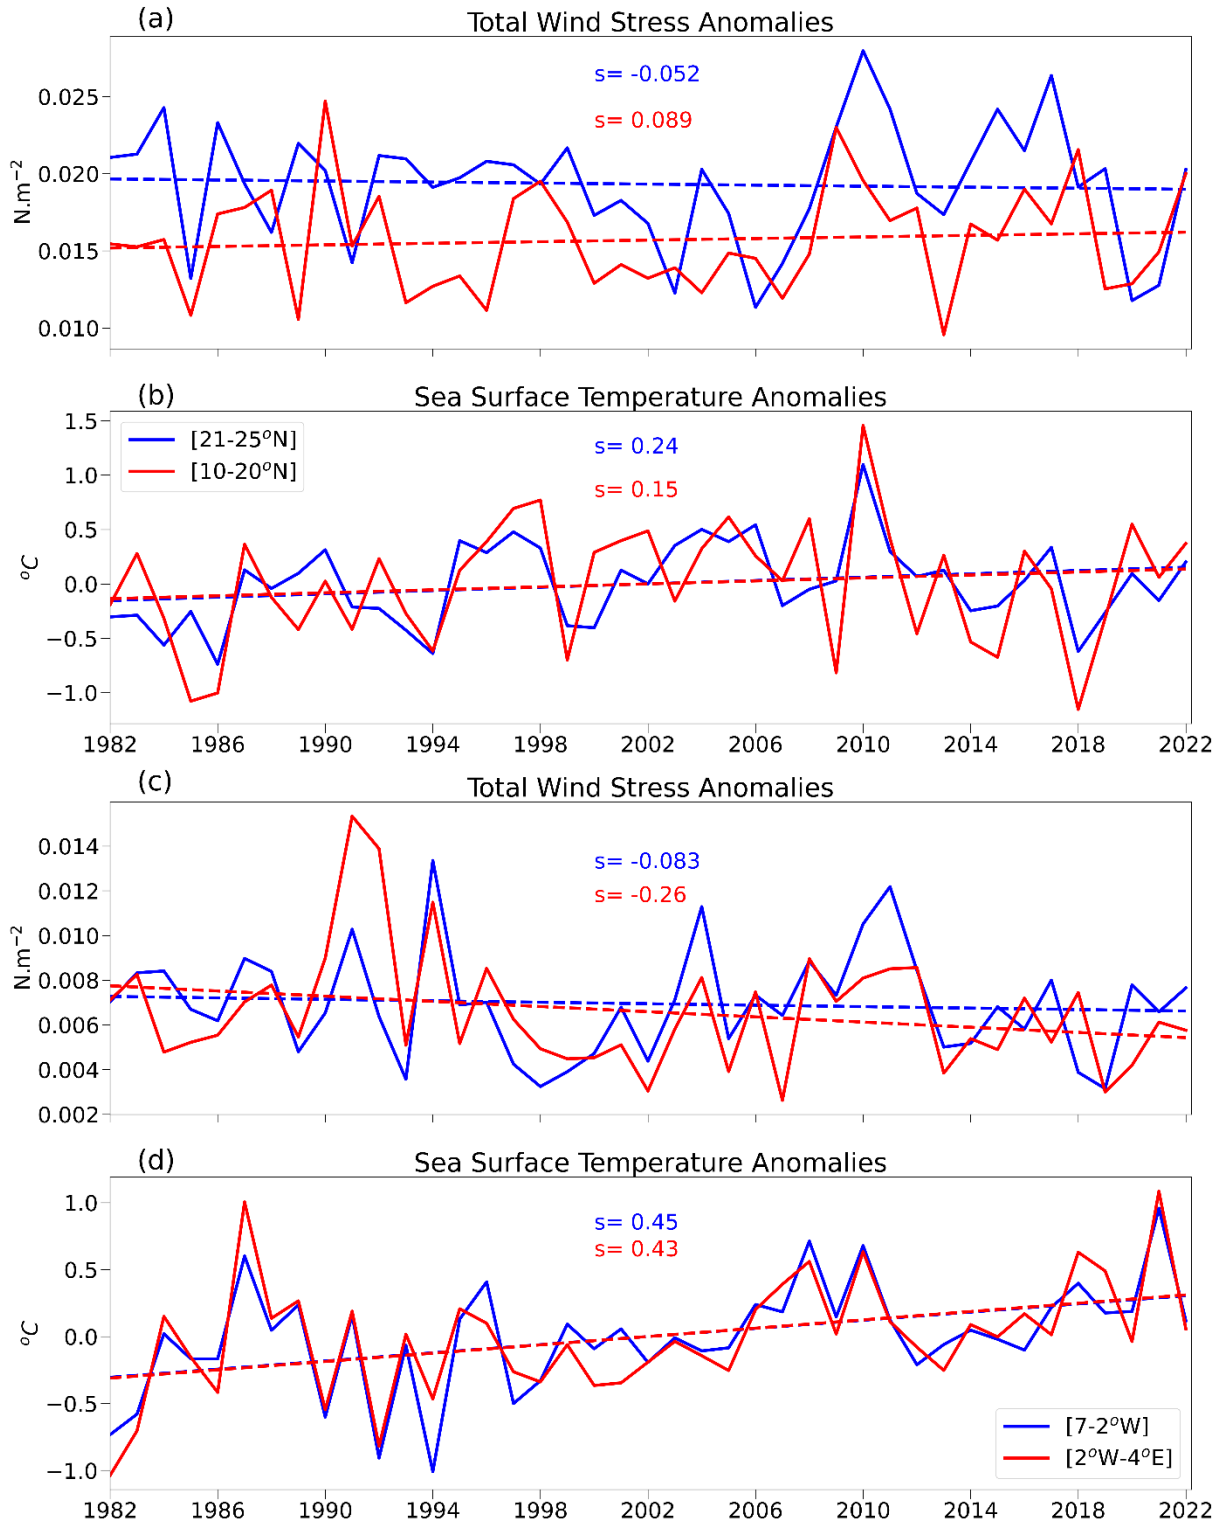

**Figure S4:** a, b Historical trends of meridional wind stress and sea surface temperature anomalies in the Senegal-Mauritania upwelling system (SMUS). Blue line denotes the time series of the permanent upwelling region, while red line indicates the time series of the seasonal upwelling region. Historical trends of meridional wind stress and sea surface temperature anomalies in the Gulf of Guinea upwelling system (GGUS). Blue line denotes the time series of the eastern of Cape Palmas, while red line indicates the time series of the eastern of Cape Three Points.
